# Supplementary material for: A High-Quality Reference Genome Assembly of Prinsepia uniflora (Rosaceae)
Source: MDPI journal article supplement (doi:10.3390/genes14112035), 2023-11-02
Supplement: s1 [file s1]

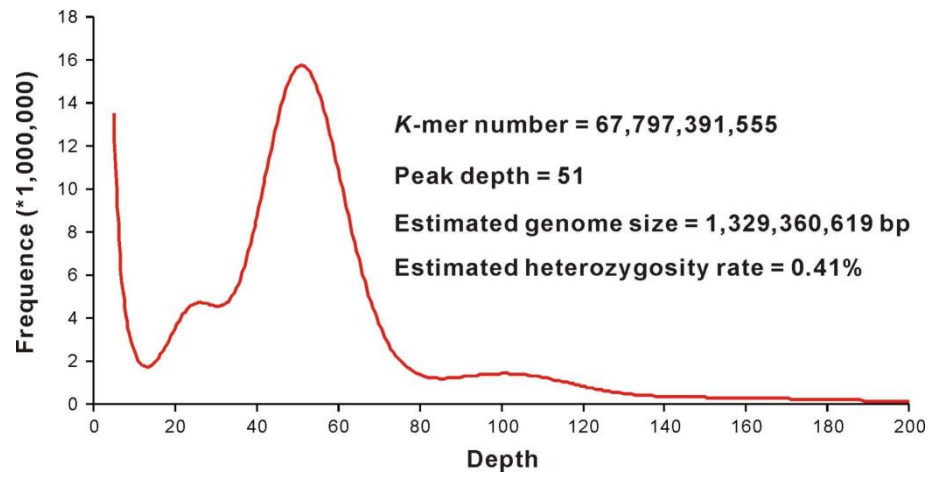

**Figure S1. A 19-mer frequency distribution of *P. uniflora* genome based on Illumina paired-end reads.**

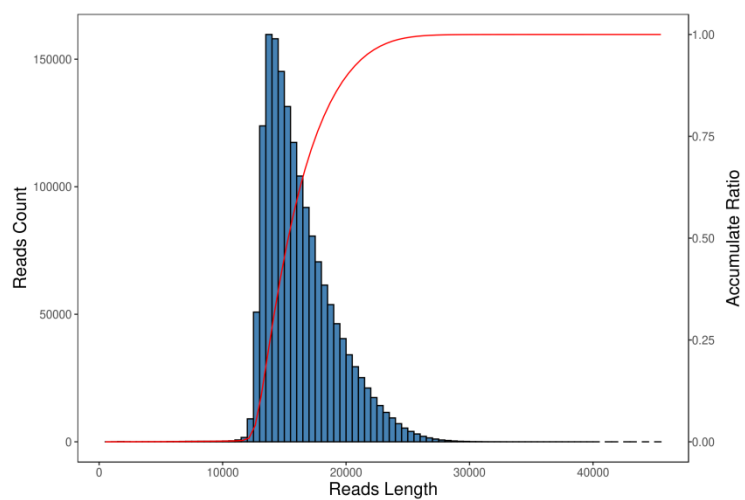

**Figure S2. Subreads length distribution of PacBio HiFi data.**

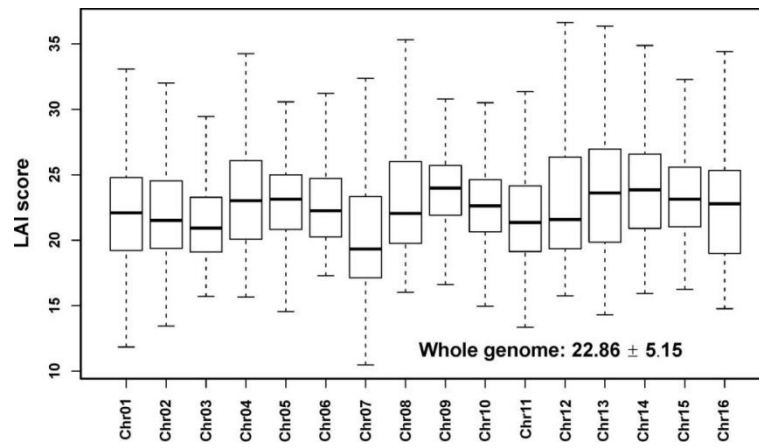

Figure S3. Distribution of LAI score in the 16 pseudochromosomes of *P. uniflora* genome.

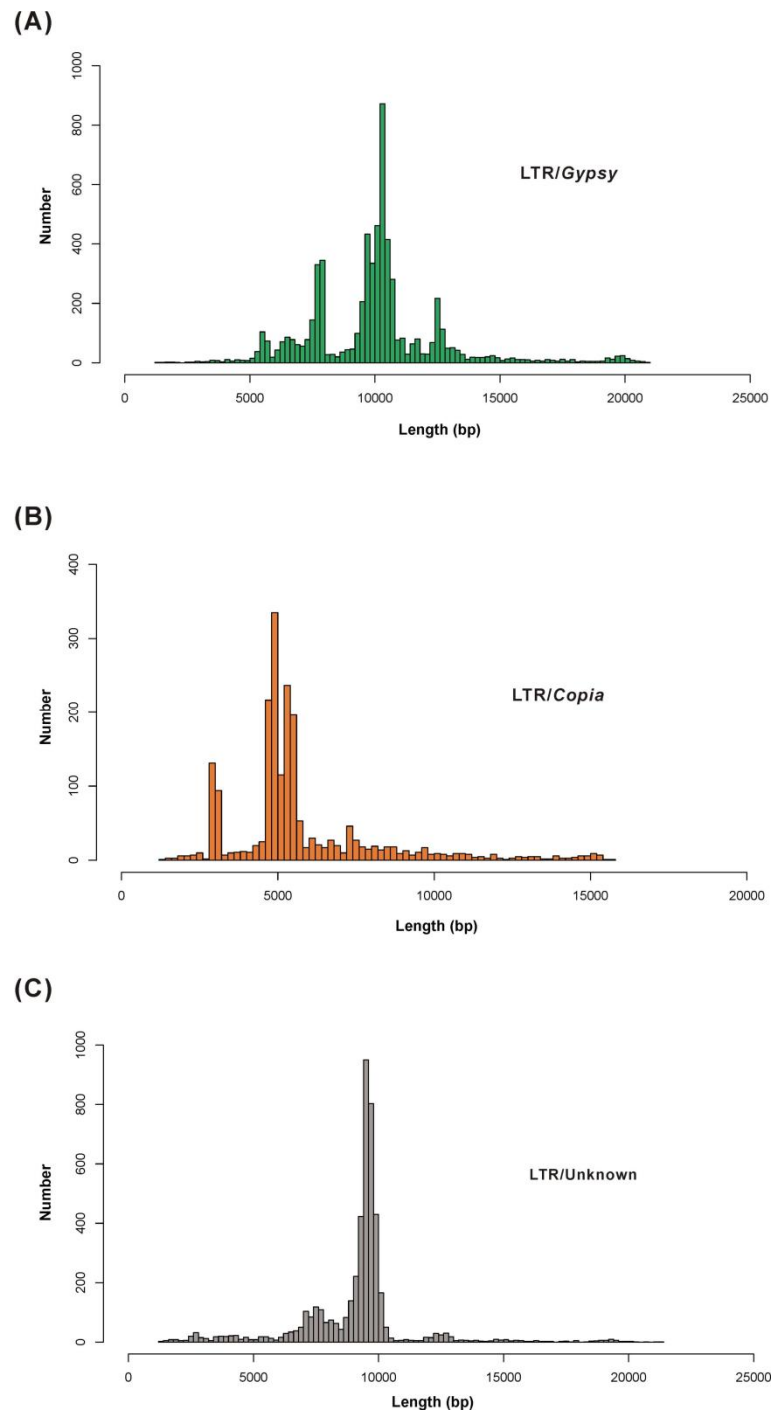

**Figure S4. Length distribution of three types of intact LTR-RTs within the *P. uniflora* genome.**

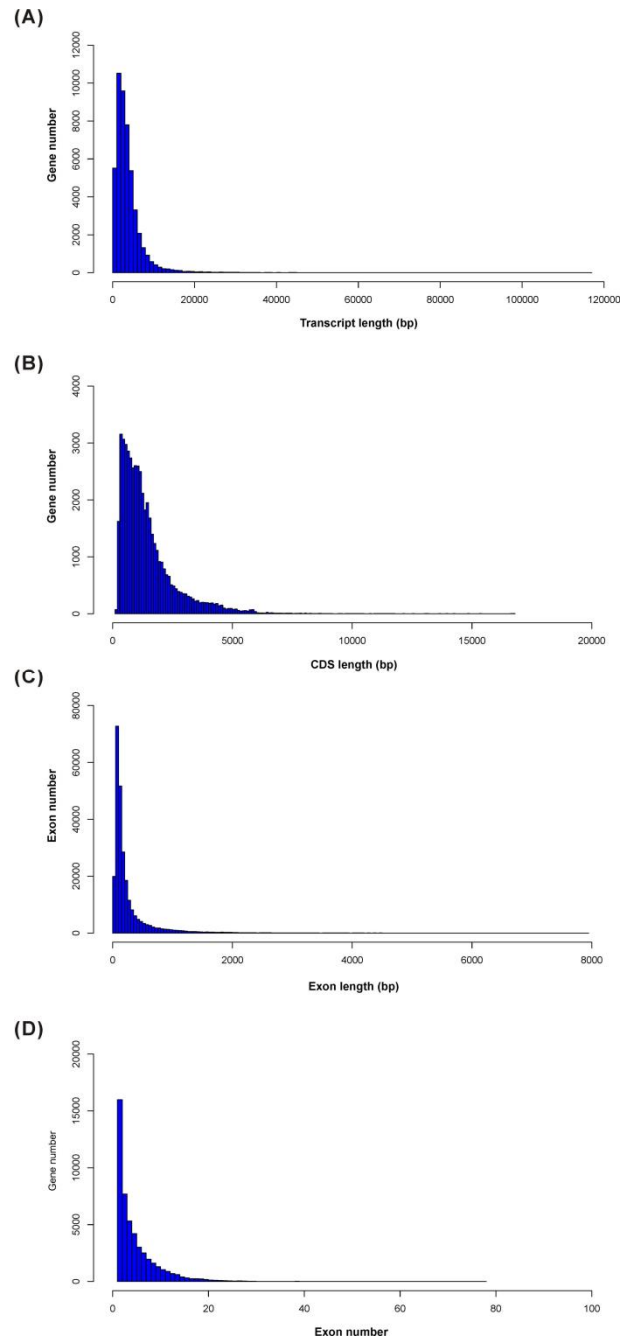

**Figure S5. General statistics of protein-coding genes within the *P. uniflora* genome.**

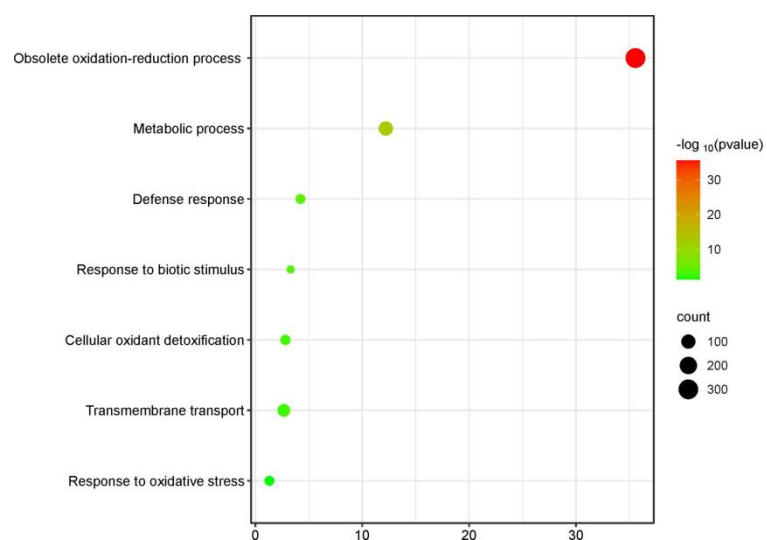

**Figure S6. GO enrichment of tandemly duplicated genes within the *P. uniflora* genome.**

|                              | <b>Illumina</b> | <b>PacBio HiFi</b> | <b>Hi-C</b>   |
|------------------------------|-----------------|--------------------|---------------|
| Number of reads              | 304,011,762*2   | 1,639,479          | 354,952,246*2 |
| Average length of reads (bp) | 150             | 16,328             | 150           |
| Total bases (Gb)             | 91.20           | 26.77              | 106.49        |
| Sequencing depth (×)*        | 68.8            | 20.2               | 80.3          |

\*The genome size was estimated to be 1,329.36 Mb

**Table S1. Summary of the whole genome sequencing data of the *P. uniflora* genome.**

|                      | Version 1     | Version 2     | Version 3     |
|----------------------|---------------|---------------|---------------|
| Number of contigs    | 3,672         | 865           | 820           |
| Total length (bp)    | 1,675,697,640 | 1,280,423,630 | 1,272,310,984 |
| GC (%)               | 41.92         | 41.76         | 41.68         |
| Shortest contig (bp) | 12,788        | 12,788        | 15,609        |
| Longest contig (bp)  | 16,383,272    | 16,383,272    | 16,383,272    |
| Contig N50 (bp)      | 2,202,736     | 2,790,945     | 2,834,015     |
| Contig N90 (bp)      | 276,877       | 838,334       | 856,082       |

**Table S2. Summary of three versions of assemblies of the *P. uniflora* genome, including version 1 (*de novo* assembly of HiFi reads), version 2 (after removing potential duplicate haplotypes), and version 3 (after removing pseudo-contigs).**



| <b>Superscaffold</b> | <b>Length (bp)</b>   | <b>Number of contigs</b> | <b>Number of genes</b> |
|----------------------|----------------------|--------------------------|------------------------|
| Chr01                | 96,324,327           | 54                       | 3,617                  |
| Chr02                | 93,777,997           | 58                       | 3,531                  |
| Chr03                | 85,328,045           | 65                       | 2,924                  |
| Chr04                | 84,812,506           | 44                       | 3,619                  |
| Chr05                | 83,562,939           | 58                       | 3,229                  |
| Chr06                | 82,060,278           | 67                       | 3,170                  |
| Chr07                | 81,142,252           | 34                       | 2,512                  |
| Chr08                | 79,319,404           | 46                       | 2,904                  |
| Chr09                | 78,344,120           | 38                       | 3,631                  |
| Chr10                | 77,664,007           | 44                       | 3,257                  |
| Chr11                | 77,279,705           | 55                       | 2,813                  |
| Chr12                | 75,529,320           | 56                       | 2,742                  |
| Chr13                | 71,387,358           | 44                       | 2,807                  |
| Chr14                | 68,583,938           | 48                       | 2,980                  |
| Chr15                | 68,314,794           | 53                       | 2,684                  |
| Chr16                | 67,276,188           | 49                       | 2,728                  |
| <b>Total</b>         | <b>1,270,707,178</b> | <b>813</b>               | <b>49,148</b>          |

**Table S3. Statistics for the 16 pseudochromosomes of the final *P. uniflora* genome.**

|                    | Contig               |            | Scaffold             |           |
|--------------------|----------------------|------------|----------------------|-----------|
|                    | Size (bp)            | Number     | Size (bp)            | Number    |
| N90                | 835,501              | 462        | 68,314,794           | 15        |
| N80                | 1,289,017            | 339        | 71,387,358           | 13        |
| N70                | 1,702,879            | 253        | 77,279,705           | 11        |
| N60                | 2,221,085            | 189        | 78,344,120           | 9         |
| N50                | 2,774,639            | 137        | 79,319,404           | 8         |
| Longest            | 16,354,998           | -          | 96,324,327           | -         |
| Sequence > 100 kb  | 1,266,785,236        | 737        | 1,271,726,023        | 19        |
| Sequence > 1000 kb | 1,099,424,360        | 411        | 1,270,707,178        | 16        |
| <b>Total</b>       | <b>1,272,310,984</b> | <b>848</b> | <b>1,272,712,484</b> | <b>45</b> |

**Table S4. Statistics of the final *P. uniflora* genome.**

|                                 | Assembly |           | Annotation |           |
|---------------------------------|----------|-----------|------------|-----------|
|                                 | Count    | Ratio (%) | Count      | Ratio (%) |
| Complete BUSCOs                 | 1,566    | 97.03     | 1,571      | 97.34     |
| Complete and single-copy BUSCOs | 829      | 51.36     | 742        | 45.97     |
| Complete and duplicated BUSCOs  | 737      | 45.66     | 829        | 51.36     |
| Fragmented BUSCOs               | 14       | 0.87      | 8          | 0.50      |
| Missing BUSCOs                  | 34       | 2.11      | 35         | 2.17      |
| Total BUSCOs                    | 1,614    | 100.00    | 1,614      | 100.00    |

**Table S5. BUSCO completeness score of assembly and annotation of the *P. uniflora* genome.**

| Type           | Length occupied (bp) | % of genome  |
|----------------|----------------------|--------------|
| DNA            | 37,247,512           | 2.93         |
| LINE           | 4,448,599            | 0.35         |
| SINE           | 424                  | 0.00         |
| LTR            | 735,579,591          | 57.80        |
| <i>Gypsy</i>   | 520,616,428          | 40.91        |
| <i>Copia</i>   | 219,837,771          | 17.27        |
| Satellite      | 2,724,843            | 0.21         |
| Simple repeat  | 1,108,226            | 0.09         |
| Low complexity | 205                  | 0.00         |
| Unclassified   | 113,335,661          | 8.91         |
| <b>Total</b>   | <b>875,996,529</b>   | <b>68.83</b> |

**Table S6. Classification of repetitive elements in the *P. uniflora* genome.**

| <b>Tissue</b> | <b>Number of<br/>reads</b> | <b>Total size (bp)</b> | <b>Accession number</b> |
|---------------|----------------------------|------------------------|-------------------------|
| Leaf          | 47,076,936                 | 6,986,626,476          | SRR26058179             |
| Stem          | 43,112,290                 | 6,387,894,904          | SRR26058178             |
| Flower        | 48,431,662                 | 7,182,882,726          | SRR26058176             |
| Root          | 49,817,502                 | 7,392,646,015          | SRR26058177             |
| <b>Total</b>  | <b>188,438,390</b>         | <b>27,950,050,121</b>  | -                       |

**Table S7. Summary of RNA-seq data from four different *P. uniflora* tissues.**

| Software         | Species                 | Number of<br>genes | Mean CDS<br>length(bp) | Exons per<br>transcript | Mean exon<br>length(bp) | Mean intron<br>length(bp) |
|------------------|-------------------------|--------------------|------------------------|-------------------------|-------------------------|---------------------------|
| GeMoMa           | <i>Prunus avium</i>     | 37,372             | 1,338                  | 5.6                     | 240                     | 420                       |
|                  | <i>Prunus mume</i>      | 36,985             | 1,327                  | 5.5                     | 240                     | 419                       |
|                  | <i>Prunus persica</i>   | 37,517             | 1,368                  | 5.7                     | 241                     | 423                       |
|                  | <i>Prunus dulcis</i>    | 36,798             | 1,372                  | 5.7                     | 238                     | 423                       |
|                  | <i>Prunus armeniaca</i> | 39,131             | 1,184                  | 5.1                     | 233                     | 428                       |
|                  | <i>Rosa chinensis</i>   | 38,659             | 1,355                  | 5.5                     | 245                     | 419                       |
| PASA             | -                       | 69,894             | 1,073                  | 7.9                     | 343                     | 426                       |
| Glimmerhmm       | -                       | 49,442             | 832                    | 3.8                     | 220                     | 8,051                     |
| Augustus         | -                       | 123,716            | 1,250                  | 4.5                     | 276                     | 516                       |
| Snap             | -                       | 29,477             | 759                    | 5.5                     | 138                     | 10,113                    |
| Genemark         | -                       | 44,134             | 1,108                  | 5.1                     | 216                     | 395                       |
| <b>Final set</b> |                         | <b>49,261</b>      | <b>1,441</b>           | <b>5.3</b>              | <b>274</b>              | <b>557</b>                |

**Table S8. Statistics of gene models predicted by various approaches.**

| TF family   | Number | TF family | Number | TF family | Number |
|-------------|--------|-----------|--------|-----------|--------|
| bHLH        | 223    | TALE      | 34     | CPP       | 10     |
| MYB         | 192    | ARF       | 32     | NF-YA     | 10     |
| ERF         | 169    | HSF       | 32     | YABBY     | 10     |
| NAC         | 159    | GATA      | 31     | CAMTA     | 9      |
| C2H2        | 120    | AP2       | 30     | RAV       | 7      |
| WRKY        | 104    | SBP       | 29     | BBR-BPC   | 6      |
| FAR1        | 92     | NF-YB     | 22     | GeBP      | 6      |
| bZIP        | 91     | ZF-HD     | 19     | LSD       | 5      |
| MYB_related | 86     | ARR-B     | 18     | NF-X1     | 4      |
| C3H         | 79     | WOX       | 18     | VOZ       | 4      |
| GRAS        | 78     | BES1      | 15     | Whirly    | 4      |
| B3          | 75     | NF-YC     | 15     | HB-PHD    | 3      |
| G2-like     | 64     | DBB       | 14     | HRT-like  | 3      |
| Trihelix    | 63     | GRF       | 14     | S1Fa-like | 2      |
| LBD         | 62     | CO-like   | 13     | SAP       | 2      |
| MIKC_MADS   | 54     | E2F/DP    | 13     | LFY       | 1      |
| HD-ZIP      | 53     | Nin-like  | 13     | NZZ/SPL   | 1      |
| Dof         | 46     | SRS       | 12     | STAT      | 1      |
| TCP         | 40     | EIL       | 11     |           |        |
| M-type_MADS | 39     | HB-other  | 11     |           |        |

**Table S9. Classification of transcription factor genes in the *P. uniflora* genome.**

|             | Number of genes | Percent (%) |
|-------------|-----------------|-------------|
| Total       | 49,261          | -           |
| Annotated   | 45,256          | 91.87       |
| NR          | 45,234          | 91.83       |
| SwissProt   | 33,116          | 67.23       |
| KEGG        | 16,706          | 33.91       |
| GO          | 14,696          | 29.83       |
| eggNOG      | 42,521          | 86.32       |
| Unannotated | 4,005           | 8.13        |

**Table S10. Functional annotation of the protein-coding genes in the *P. uniflora* genome.**



| #Genes/array   | #Array | #Gene |
|----------------|--------|-------|
| 2              | 1,464  | 2,928 |
| 3              | 263    | 789   |
| 4              | 107    | 428   |
| 5              | 47     | 235   |
| 6              | 23     | 138   |
| 7              | 14     | 98    |
| 8              | 9      | 72    |
| 9              | 7      | 63    |
| 10             | 5      | 50    |
| >10            | 13     | 326   |
| Total          | 1,952  | 5,127 |
| % of all genes | 10.41  |       |

**Table S11. Summary of tandemly duplicated genes in the *P. uniflora* genome.**

| Type     | Number | Average<br>length (bp) | Total<br>length<br>(bp) |
|----------|--------|------------------------|-------------------------|
| miRNA    | 181    | 128.08                 | 23,183                  |
| tRNA     | 957    | 75.52                  | 72,275                  |
| rRNA     | 1,216  | 271.15                 | 329,717                 |
| 28S      | 329    | 124.82                 | 41,066                  |
| 18S      | 117    | 1,674.85               | 195,957                 |
| 5.8S     | 109    | 154.14                 | 16,801                  |
| 5S       | 661    | 114.82                 | 75,893                  |
| snRNA    | 726    | 115.75                 | 84,037                  |
| CD-box   | 468    | 100.06                 | 46,829                  |
| HACA-box | 77     | 125.40                 | 9,656                   |
| Splicing | 181    | 152.22                 | 27,552                  |

**Table S12. Summary of non-coding RNAs in the *P. uniflora* genome.**
